# Supplementary material
Source: PubMed Central journal article supplement (PMC9511634)
Supplement: NEJMoa2208343_data-sharing.pdf [file NEJMoa2208343_data-sharing.pdf]

## Data Sharing Statement

Chalkias S, Harper C, Vrbicky K, et al. A Bivalent Omicron-Containing Booster Vaccine against Covid-19. N Engl J Med. DOI: 10.1056/NEJMoa2208343.

| Question                                                            | Authors' Response                                                                                                                                                                                           |
|---------------------------------------------------------------------|-------------------------------------------------------------------------------------------------------------------------------------------------------------------------------------------------------------|
| Will the data collected for your study be made available to others? | No                                                                                                                                                                                                          |
| Would you like to offer context for your decision?                  | As the trial is ongoing, access to patient-level data and supporting clinical documents with qualified external researchers may be available upon request and subject to review once the trial is complete. |
| Which data?                                                         | —                                                                                                                                                                                                           |
| Additional information about data                                   | —                                                                                                                                                                                                           |
| How or where can the data be obtained?                              | —                                                                                                                                                                                                           |
| When will data availability begin?                                  | —                                                                                                                                                                                                           |
| When will data availability end?                                    | —                                                                                                                                                                                                           |
| Will any supporting documents be available?                         | —                                                                                                                                                                                                           |
| Which supporting documents?                                         | —                                                                                                                                                                                                           |
| Additional information about supporting documents                   | —                                                                                                                                                                                                           |
| How or where can supporting documents be obtained?                  | —                                                                                                                                                                                                           |
| When will supporting documents availability begin?                  | —                                                                                                                                                                                                           |
| When will supporting documents availability end?                    | —                                                                                                                                                                                                           |
| To whom will data be available?                                     | —                                                                                                                                                                                                           |
| For what type of analysis or purpose?                               | —                                                                                                                                                                                                           |
| By what mechanism?                                                  | —                                                                                                                                                                                                           |
| Any other restrictions?                                             | —                                                                                                                                                                                                           |
| Additional information                                              | —                                                                                                                                                                                                           |

This statement was posted on September 16, 2022, at NEJM.org.
