# Supplementary material
Source: PubMed Central journal article supplement (PMC9511634)
Supplement: NEJMoa2208343_disclosures.pdf [file NEJMoa2208343_disclosures.pdf]

Disclosure Purpose: 22-08343

## Summary of Interests

### Company or Organization

| Entity                                                                                                                                                                              | Type             | Interest Held By                                                                |
|-------------------------------------------------------------------------------------------------------------------------------------------------------------------------------------|------------------|---------------------------------------------------------------------------------|
| <b>Bill and Melinda Gates Foundation</b>                                                                                                                                            | Grant / Contract | Self                                                                            |
| <i>Recipient Name:</i> Lindsey Baden<br><i>Grant / Contract Description:</i> Vaccine and mAb development for Infectious Diseases<br><i>Additional Information:</i>                  |                  | <i>Recipient Type:</i> Institution<br><i>Grant / Contract Purpose:</i> Research |
| <b>Harvard Medical School</b>                                                                                                                                                       | Grant / Contract | Self                                                                            |
| <i>Recipient Name:</i> Lindsey Baden<br><i>Grant / Contract Description:</i> Support clinical research, Covid response<br><i>Additional Information:</i>                            |                  | <i>Recipient Type:</i> Institution<br><i>Grant / Contract Purpose:</i> Research |
| <b>National Institutes of Health</b>                                                                                                                                                | Grant / Contract | Self                                                                            |
| <i>Recipient Name:</i> Lindsey Baden<br><i>Grant / Contract Description:</i> NIAID, NCATS. Support multiple activities: vaccine development, CTSA<br><i>Additional Information:</i> |                  | <i>Recipient Type:</i> Institution<br><i>Grant / Contract Purpose:</i> Research |
| <b>Wellcome Trust</b>                                                                                                                                                               | Grant / Contract | Self                                                                            |
| <i>Recipient Name:</i> Lindsey Baden<br><i>Grant / Contract Description:</i> Develop Cholera Vaccine<br><i>Additional Information:</i>                                              |                  | <i>Recipient Type:</i> Institution<br><i>Grant / Contract Purpose:</i> Research |

## Additional Questions:

- Are there other relationships or activities that readers could perceive to have influenced, or that give the appearance of potentially influencing, what you wrote in the submitted work?**

Yes.

  - Please describe those relationships.**

Dr. Baden reports grants from NIH/NIAID for the conduct of this study; in addition grants from NIH/ NIAID, Gates Foundation, and Wellcome Trust, outside the submitted work; and Dr. Baden is a Deputy Editor at the New England Journal of Medicine. Dr. Baden is involved in HIV, other pathogens, and COVID vaccine clinical trials conducted in collaboration with the NIH, HIV Vaccine Trials Network (HVTN), COVID Vaccine Prevention Network (CoVPN), International AIDS Vaccine Initiative (IAVI), Crucell/ Janssen, Moderna, Military HIV Research Program (MHRP), Gates Foundation, and the Ragon Institute.
- What is the manuscript title?**

22-08343
- Are you the corresponding author?**

No.

## Certification

I certify that the information provided in this disclosure is complete and accurate.

**Disclosure Purpose:** 22-08343

**Summary of Interests**

I do not have any interests to disclose at this time.

**Additional Questions:**

- 1. **Are there other relationships or activities that readers could perceive to have influenced, or that give the appearance of potentially influencing, what you wrote in the submitted work?**  
No.
- 2. **What is the manuscript title?**  
A Bivalent Omicron-containing Booster Vaccine Against Covid-19
- 3. **Are you the corresponding author?**  
No.

**Certification**

I certify that the information provided in this disclosure is complete and accurate.

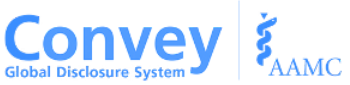

Disclosure Purpose: 22-08343

Summary of Interests

**Company or Organization**

| Entity                                                                 | Type       | Interest Held By             |
|------------------------------------------------------------------------|------------|------------------------------|
| Moderna                                                                | Employment | Self                         |
| <i>Title:</i><br>Additional Information: Full-time employee, own stock |            | <i>Position Description:</i> |

Additional Questions:

- Are there other relationships or activities that readers could perceive to have influenced, or that give the appearance of potentially influencing, what you wrote in the submitted work?  
No.
- What is the manuscript title?  
A Bivalent Omicron-containing Booster Vaccine Against Covid-19
- Are you the corresponding author?  
Yes.
  - Please list the other authors' names here.  
Charles Harper<sup>2</sup>, Keith Vrbicky<sup>2</sup>, Stephen R. Walsh<sup>3</sup>, Brandon Essink<sup>4</sup>, Adam Brosz<sup>5</sup>, Nichole McGhee<sup>1</sup>, Joanne E. Tomassini<sup>1</sup>, Xing Chen<sup>1</sup>, Ying Chang<sup>1</sup>, Andrea Sutherland<sup>1</sup>, David C. Montefiori<sup>6</sup>, Bethany Girard<sup>1</sup>, Darin K. Edwards<sup>1</sup>, Jing Feng<sup>1</sup>, Honghong Zhou<sup>1</sup>, Lindsey R. Baden<sup>3</sup>, Jacqueline M. Miller<sup>1</sup>, Rituparna Das<sup>1</sup>

Certification

I certify that the information provided in this disclosure is complete and accurate.

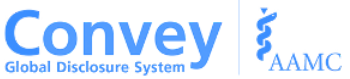

**Disclosure Purpose:** 22-08343

Summary of Interests

I do not have any interests to disclose at this time.

Additional Questions:

- 1. **Are there other relationships or activities that readers could perceive to have influenced, or that give the appearance of potentially influencing, what you wrote in the submitted work?**  
No.
- 2. **What is the manuscript title?**  
A Bivalent Omicron-containing Booster Vaccine Against Covid-19
- 3. **Are you the corresponding author?**  
No.

Certification

I certify that the information provided in this disclosure is complete and accurate.

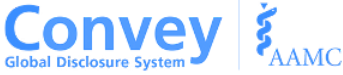

Disclosure Purpose: 22-08343

Summary of Interests

**Company or Organization**

| Entity                         | Type         | Interest Held By                           |
|--------------------------------|--------------|--------------------------------------------|
| Moderna                        | Employment   | Self                                       |
| <i>Title:</i> Director         |              | <i>Position Description:</i> Biostatistics |
| <i>Additional Information:</i> |              |                                            |
| Moderna                        | Stock        | Self                                       |
| <i>Additional Information:</i> |              |                                            |
| Moderna                        | Stock Option | Self                                       |
| <i>Additional Information:</i> |              |                                            |

Additional Questions:

- Are there other relationships or activities that readers could perceive to have influenced, or that give the appearance of potentially influencing, what you wrote in the submitted work?**  
No.
- What is the manuscript title?**  
A Bivalent Omicron-containing Booster Vaccine Against Covid-19
- Are you the corresponding author?**  
No.

Certification

I certify that the information provided in this disclosure is complete and accurate.

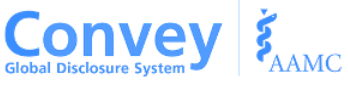

Disclosure Purpose: 22-08343

Summary of Interests

**Company or Organization**

| Entity                                                            | Type       | Interest Held By             |
|-------------------------------------------------------------------|------------|------------------------------|
| Moderna Therapeutics                                              | Employment | Self                         |
| <i>Title:</i> VP COVID Vaccines<br><i>Additional Information:</i> |            | <i>Position Description:</i> |

Additional Questions:

- Are there other relationships or activities that readers could perceive to have influenced, or that give the appearance of potentially influencing, what you wrote in the submitted work?**  
No.
- What is the manuscript title?**  
A Bivalent Omicron-containing Booster Vaccine Against Covid-19
- Are you the corresponding author?**  
No.

Certification

I certify that the information provided in this disclosure is complete and accurate.

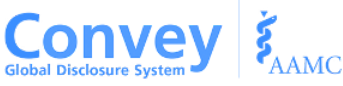

**Disclosure Purpose:** 22-08343

## Summary of Interests

| Company or Organization                                                |            |                                                       |
|------------------------------------------------------------------------|------------|-------------------------------------------------------|
| Entity                                                                 | Type       | Interest Held By                                      |
| Moderna                                                                | Employment | Self                                                  |
| <i>Title:</i> Director of Immunology<br><i>Additional Information:</i> |            | <i>Position Description:</i> Research and Development |

## Additional Questions:

- Are there other relationships or activities that readers could perceive to have influenced, or that give the appearance of potentially influencing, what you wrote in the submitted work?**  
No.
- What is the manuscript title?**  
A Bivalent Omicron-containing Booster Vaccine Against Covid-19
- Are you the corresponding author?**  
No.

## Certification

I certify that the information provided in this disclosure is complete and accurate.

**Disclosure Purpose:** 22-08343

**Summary of Interests**

I do not have any interests to disclose at this time.

**Additional Questions:**

- 1. **Are there other relationships or activities that readers could perceive to have influenced, or that give the appearance of potentially influencing, what you wrote in the submitted work?**  
No.
- 2. **What is the manuscript title?**  
Phase 3 Trial of mRNA-1273 SARS-CoV-2 Vaccine: Completion of Blinded Phase
- 3. **Are you the corresponding author?**  
No.

**Certification**

I certify that the information provided in this disclosure is complete and accurate.





Disclosure Purpose: 22-08343

Summary of Interests

**Company or Organization**

| Entity                                                   | Type       | Interest Held By             |
|----------------------------------------------------------|------------|------------------------------|
| Moderna                                                  | Employment | Self                         |
| <i>Title:</i> Director<br><i>Additional Information:</i> |            | <i>Position Description:</i> |
| Moderna                                                  | Stock      | Self                         |
| <i>Additional Information:</i>                           |            |                              |

Additional Questions:

- Are there other relationships or activities that readers could perceive to have influenced, or that give the appearance of potentially influencing, what you wrote in the submitted work?**  
No.
- What is the manuscript title?**  
A Bivalent Omicron-containing Booster Vaccine Against Covid-19
- Are you the corresponding author?**  
No.

Certification

I certify that the information provided in this disclosure is complete and accurate.

Disclosure Purpose: 22-08343

Summary of Interests

**Company or Organization**

| Entity                                                                                   | Type       | Interest Held By             |
|------------------------------------------------------------------------------------------|------------|------------------------------|
| Moderna Therapeutics                                                                     | Employment | Self                         |
| <i>Title:</i> Associate Director - Clinical Biomarkers<br><i>Additional Information:</i> |            | <i>Position Description:</i> |

Additional Questions:

- Are there other relationships or activities that readers could perceive to have influenced, or that give the appearance of potentially influencing, what you wrote in the submitted work?**  
No.
- What is the manuscript title?**  
A Bivalent Omicron-containing Booster Vaccine Against Covid-19
- Are you the corresponding author?**  
No.

Certification

I certify that the information provided in this disclosure is complete and accurate.

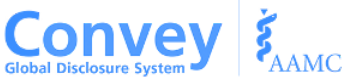

**Disclosure Purpose:** 22-08343

### Summary of Interests

I do not have any interests to disclose at this time.

### Additional Questions:

- Are there other relationships or activities that readers could perceive to have influenced, or that give the appearance of potentially influencing, what you wrote in the submitted work?**  
No.
- What is the manuscript title?**  
A Bivalent Omicron-containing Booster Vaccine Against Covid-19
- Are you the corresponding author?**  
No.

### Certification

I certify that the information provided in this disclosure is complete and accurate.

Disclosure Purpose: 22-08343

Summary of Interests

**Company or Organization**

| Entity                                                                   | Type         | Interest Held By             |
|--------------------------------------------------------------------------|--------------|------------------------------|
| Moderna Tx                                                               | Employment   | Self                         |
| <i>Title:</i> Clinical Operations Lead<br><i>Additional Information:</i> |              | <i>Position Description:</i> |
| Moderna Tx                                                               | Stock Option | Self                         |
| <i>Additional Information:</i>                                           |              |                              |

Additional Questions:

- Are there other relationships or activities that readers could perceive to have influenced, or that give the appearance of potentially influencing, what you wrote in the submitted work?**  
No.
- What is the manuscript title?**  
A Bivalent Omicron Containing Booster Vaccine Against COVID-19
- Are you the corresponding author?**  
No.

Certification

I certify that the information provided in this disclosure is complete and accurate.

**Disclosure Purpose:** 22-08343

## Summary of Interests

| Company or Organization                                  |              |                                                                                                               |
|----------------------------------------------------------|--------------|---------------------------------------------------------------------------------------------------------------|
| Entity                                                   | Type         | Interest Held By                                                                                              |
| Moderna                                                  | Employment   | Self                                                                                                          |
| <i>Title:</i> Therapeutic Area Head, Infectious Diseases |              | <i>Position Description:</i> Head of development activities for vaccines and monoclonal antibodies at Moderna |
| <i>Additional Information:</i>                           |              |                                                                                                               |
| Moderna                                                  | Stock        | Self                                                                                                          |
| <i>Additional Information:</i>                           |              |                                                                                                               |
| Moderna                                                  | Stock Option | Self                                                                                                          |
| <i>Additional Information:</i>                           |              |                                                                                                               |

## Additional Questions:

- Are there other relationships or activities that readers could perceive to have influenced, or that give the appearance of potentially influencing, what you wrote in the submitted work?**  
No.
- What is the manuscript title?**  
A Bivalent Omicron-containing Booster Vaccine Against COVID-19
- Are you the corresponding author?**  
No.

## Certification

I certify that the information provided in this disclosure is complete and accurate.

**Disclosure Purpose:** 22-08343

## Summary of Interests

**Company or Organization**

| Entity                  | Type             | Interest Held By |
|-------------------------|------------------|------------------|
| <a href="#">Moderna</a> | Grant / Contract | Self             |

*Recipient Name:* David C. Montefiori  
*Grant / Contract Description:* Laboratory assessments of neutralizing antibody responses in COVID-19 vaccine clinical trials

*Recipient Type:* Institution  
*Grant / Contract Purpose:* Research  
*Additional Information:*

## Additional Questions:

- Are there other relationships or activities that readers could perceive to have influenced, or that give the appearance of potentially influencing, what you wrote in the submitted work?**  
No.
- What is the manuscript title?**  
A Bivalent Omicron-containing Booster Vaccine Against Covid-19
- Are you the corresponding author?**  
No.

## Certification

I certify that the information provided in this disclosure is complete and accurate.

Disclosure Purpose: 22-08343

Summary of Interests

**Company or Organization**

| Entity                                                                                   | Type       | Interest Held By             |
|------------------------------------------------------------------------------------------|------------|------------------------------|
| <a href="#">ModernaTx</a>                                                                | Employment | Self                         |
| <i>Title:</i> Senior Director, Global Safety Physician<br><i>Additional Information:</i> |            | <i>Position Description:</i> |

Additional Questions:

- Are there other relationships or activities that readers could perceive to have influenced, or that give the appearance of potentially influencing, what you wrote in the submitted work?**  
No.
- What is the manuscript title?**  
A Bivalent Omicron-containing Booster Vaccine Against Covid-19
- Are you the corresponding author?**  
No.

Certification

I certify that the information provided in this disclosure is complete and accurate.



Disclosure Purpose: 22-08343

Summary of Interests

**Company or Organization**

| Entity                                                        | Type       | Interest Held By                                   |
|---------------------------------------------------------------|------------|----------------------------------------------------|
| <a href="#">Moderna, Inc.</a>                                 | Consultant | Self                                               |
| <i>Category:</i> Consultant<br><i>Additional Information:</i> |            | <i>Description:</i> Infectious diseases consultant |

Additional Questions:

- Are there other relationships or activities that readers could perceive to have influenced, or that give the appearance of potentially influencing, what you wrote in the submitted work?**  
No.
- What is the manuscript title?**  
A Bivalent Omicron-containing Booster Vaccine Against Covid-19
- Are you the corresponding author?**  
No.

Certification

I certify that the information provided in this disclosure is complete and accurate.

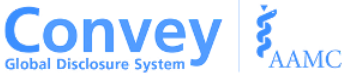



**Disclosure Purpose:** 22-08343

**Summary of Interests**

I do not have any interests to disclose at this time.

**Additional Questions:**

- 1. **Are there other relationships or activities that readers could perceive to have influenced, or that give the appearance of potentially influencing, what you wrote in the submitted work?**  
No.
- 2. **What is the manuscript title?**  
Omicron Bivalent Vaccine
- 3. **Are you the corresponding author?**  
No.

**Certification**

I certify that the information provided in this disclosure is complete and accurate.

Disclosure Purpose: 22-08343

## Summary of Interests

### Company or Organization

| Entity                                                                                                                                                         | Type                       | Interest Held By                                                                |
|----------------------------------------------------------------------------------------------------------------------------------------------------------------|----------------------------|---------------------------------------------------------------------------------|
| Janssen Biotech                                                                                                                                                | Grant / Contract           | Self                                                                            |
| <i>Recipient Name:</i> Brigham and Women's Hospital<br><i>Grant / Contract Description:</i> Clinical trial funding<br><i>Additional Information:</i>           |                            | <i>Recipient Type:</i> Institution<br><i>Grant / Contract Purpose:</i> Research |
| Janssen Biotech                                                                                                                                                | Grant / Contract           | Self                                                                            |
| <i>Recipient Name:</i> Beth Israel Deaconess Medical Center<br><i>Grant / Contract Description:</i> Clinical trial funding<br><i>Additional Information:</i>   |                            | <i>Recipient Type:</i> Institution<br><i>Grant / Contract Purpose:</i> Research |
| Janssen Biotech                                                                                                                                                | Data And Safety Monitoring | Self                                                                            |
| <i>Category:</i> Data And Safety Monitoring<br><i>Additional Information:</i>                                                                                  |                            | <i>Description:</i> IDMC for RSV vaccine                                        |
| Moderna                                                                                                                                                        | Grant / Contract           | Self                                                                            |
| <i>Recipient Name:</i> Brigham and Women's Hospital<br><i>Grant / Contract Description:</i> Clinical trials of COVID vaccine<br><i>Additional Information:</i> |                            | <i>Recipient Type:</i> Institution<br><i>Grant / Contract Purpose:</i> Research |
| SANOFI PASTEUR INC.                                                                                                                                            | Grant / Contract           | Self                                                                            |
| <i>Recipient Name:</i> Brigham and Women's Hospital<br><i>Grant / Contract Description:</i> Clinical trials of COVID vaccine<br><i>Additional Information:</i> |                            | <i>Recipient Type:</i> Institution<br><i>Grant / Contract Purpose:</i> Research |

### Additional Questions:

1. **Are there other relationships or activities that readers could perceive to have influenced, or that give the appearance of potentially influencing, what you wrote in the submitted work?**  
No.
2. **What is the manuscript title?**  
A Bivalent Omicron-Containing Booster Vaccine against Covid-19
3. **Are you the corresponding author?**  
No.

### Certification

I certify that the information provided in this disclosure is complete and accurate.

**Disclosure Purpose:** 22-08343

## Summary of Interests

| Company or Organization                                                                             |            |                                            |
|-----------------------------------------------------------------------------------------------------|------------|--------------------------------------------|
| Entity                                                                                              | Type       | Interest Held By                           |
| Moderna                                                                                             | Employment | Self                                       |
| <i>Title:</i> Sr. Director<br><i>Additional Information:</i>                                        |            | <i>Position Description:</i> Biostatistics |
| Moderna                                                                                             | Stock      | Self                                       |
| <i>Additional Information:</i> As an employee of Moderna, i am also a stock holder of Moderna stock |            |                                            |

## Additional Questions:

- Are there other relationships or activities that readers could perceive to have influenced, or that give the appearance of potentially influencing, what you wrote in the submitted work?**  
No.
- What is the manuscript title?**  
A Bivalent Omicron-containing Booster Vaccine Against Covid-19
- Are you the corresponding author?**  
No.

## Certification

I certify that the information provided in this disclosure is complete and accurate.
